# Supplementary material for: The Acute Stroke or Transient Ischemic Attack Treated with Ticagrelor and Aspirin for Prevention of Stroke and Death (THALES) trial: Rationale and design
Source: PubMed Central journal article supplement — Int J Stroke. 2019 Feb 12;14(7):745–51. doi: 10.1177/1747493019830307 (PMC6826854; doi:10.1177/1747493019830307), 2019-02-12
Supplement: Supplemental_Material.pdf [file Supplemental_Material.pdf]

## ONLINE APPENDIX

**Table S1.** Inclusion criteria in the THALES study.

| <b>THALES inclusion criteria</b>                                                                                                                                                                                                                                                                                                                                                                                                                                                                                                                                                                                                                                                                                                                                                                                                                                                                                                                                                                                                                                                                                                                                                                                                                                                                                                                                                                                                                  |
|---------------------------------------------------------------------------------------------------------------------------------------------------------------------------------------------------------------------------------------------------------------------------------------------------------------------------------------------------------------------------------------------------------------------------------------------------------------------------------------------------------------------------------------------------------------------------------------------------------------------------------------------------------------------------------------------------------------------------------------------------------------------------------------------------------------------------------------------------------------------------------------------------------------------------------------------------------------------------------------------------------------------------------------------------------------------------------------------------------------------------------------------------------------------------------------------------------------------------------------------------------------------------------------------------------------------------------------------------------------------------------------------------------------------------------------------------|
| 1. Provision of signed informed consent prior to any study-specific procedure                                                                                                                                                                                                                                                                                                                                                                                                                                                                                                                                                                                                                                                                                                                                                                                                                                                                                                                                                                                                                                                                                                                                                                                                                                                                                                                                                                     |
| 2. $\geq 40$ years of age                                                                                                                                                                                                                                                                                                                                                                                                                                                                                                                                                                                                                                                                                                                                                                                                                                                                                                                                                                                                                                                                                                                                                                                                                                                                                                                                                                                                                         |
| 3. Acute onset of cerebral ischemia due to either:<br>(a) AIS with NIHSS $\leq 5$ . AIS is defined as acute onset of neurological deficit attributed to focal brain ischemia, and either of the following: <ul style="list-style-type: none"><li>– Persistent signs or symptoms of the ischemic event at the time of randomization, OR</li><li>– Acute ischemic brain lesion documented before randomization by CT scan or MRI (diffusion-weighted imaging) and that could account for the clinical presentation</li></ul><br>(b) High-risk TIA, defined as neurological deficit of acute onset attributed to focal ischemia of the brain by history or examination with complete resolution of the deficit, and at least one of the following: <ul style="list-style-type: none"><li>– ABCD<sup>2</sup> score <math>\geq 6</math> and TIA symptoms not limited to isolated numbness, isolated visual changes, or isolated dizziness/vertigo</li><li>– Symptomatic intracranial arterial occlusive disease that could account for the clinical presentation, documented by transcranial Doppler or vascular imaging and defined as at least 50% narrowing in the diameter of the vessel lumen</li><li>– Internal carotid arterial occlusive disease that could account for the clinical presentation, documented by Doppler, ultrasound, or vascular imaging, and defined as at least 50% narrowing in the diameter of the vessel lumen</li></ul> |
| 4. Randomization occurring within 24 h after onset of symptoms; for wake-up strokes (when the time of symptom onset is not known), within 24 h from the time point at which the patient was reported to be in their normal condition                                                                                                                                                                                                                                                                                                                                                                                                                                                                                                                                                                                                                                                                                                                                                                                                                                                                                                                                                                                                                                                                                                                                                                                                              |
| 5. CT or MRI performed after symptom onset ruling out intracranial hemorrhage or other pathology, such as vascular malformation, tumor, or abscess that, according to the investigator could explain symptoms or contraindicate study treatment                                                                                                                                                                                                                                                                                                                                                                                                                                                                                                                                                                                                                                                                                                                                                                                                                                                                                                                                                                                                                                                                                                                                                                                                   |

ABCD<sup>2</sup> score is a clinical score based on: age, blood pressure, clinical features, duration of TIA, and diabetes.

AIS: acute ischemic stroke; CT: computed tomography; MRI: magnetic resonance imaging;  
NIHSS: National Institutes of Health Stroke Scale; TIA: transient ischemic attack.

**Table S2.** Exclusion criteria in the THALES study.

| <b>THALES exclusion criteria</b>                                                                                                                                                                                                                                                                                                                                                                                                                                                                                                                                                                                                                                                                                                                                                                                                                                   |
|--------------------------------------------------------------------------------------------------------------------------------------------------------------------------------------------------------------------------------------------------------------------------------------------------------------------------------------------------------------------------------------------------------------------------------------------------------------------------------------------------------------------------------------------------------------------------------------------------------------------------------------------------------------------------------------------------------------------------------------------------------------------------------------------------------------------------------------------------------------------|
| 1. Need for, or an anticipated need for, any of the following:<br>(a) DAPT with aspirin and P2Y <sub>12</sub> inhibitors (including patients with carotid artery stenting and percutaneous coronary intervention)<br>(b) Antiplatelets other than aspirin (e.g. GPIIb/IIIa inhibitors, clopidogrel, ticlopidine, prasugrel, dipyridamole, ozagrel, cilostazol, ticagrelor) and other antithrombotic agents with antiplatelet effects, including traditional/herbal medicine agents<br>(c) Anticoagulants (e.g. warfarin, oral thrombin and factor Xa inhibitors, bivalirudin, hirudin, argatroban, fondaparinux, or unfractionated heparin and long-term treatment with low-molecular weight heparins). Short-term treatment ( $\leq 7$ days) with low-dose low-molecular weight heparin may be used in immobilized patients at the discretion of the investigator |
| 2. Any history of atrial fibrillation/flutter, ventricular aneurysm, or suspicion of other cardioembolic pathology for TIA or stroke                                                                                                                                                                                                                                                                                                                                                                                                                                                                                                                                                                                                                                                                                                                               |
| 3. Patients who should receive or have received any intravenous or intra-arterial thrombolysis or mechanical thrombectomy within 24 h prior to randomization                                                                                                                                                                                                                                                                                                                                                                                                                                                                                                                                                                                                                                                                                                       |
| 4. Planned carotid endarterectomy that requires halting investigational product within 3 days of randomization or is expected to require unblinding of investigational product (planned carotid endarterectomy is in itself not an exclusion criterion)                                                                                                                                                                                                                                                                                                                                                                                                                                                                                                                                                                                                            |
| 5. History of previous intracranial hemorrhage at any time (asymptomatic microbleeds do not qualify), gastrointestinal hemorrhage within the past 6 months, or major surgery within 30 days                                                                                                                                                                                                                                                                                                                                                                                                                                                                                                                                                                                                                                                                        |
| 6. Patients considered to be at risk of bradycardic events (e.g. known sick sinus syndrome or second- or third-degree atrioventricular block) unless already treated with a permanent pacemaker                                                                                                                                                                                                                                                                                                                                                                                                                                                                                                                                                                                                                                                                    |
| 7. Inability of the patient to understand and/or comply with study procedures and/or follow-up, in the opinion of the investigator                                                                                                                                                                                                                                                                                                                                                                                                                                                                                                                                                                                                                                                                                                                                 |
| 8. Known hypersensitivity to ticagrelor or aspirin                                                                                                                                                                                                                                                                                                                                                                                                                                                                                                                                                                                                                                                                                                                                                                                                                 |
| 9. Need for or an anticipated need for oral or intravenous therapy with any of the following:<br>(a) Strong CYP3A4 inhibitors (e.g. ketoconazole, clarithromycin [but not erythromycin or azithromycin], nefazodone, ritonavir, atazanavir) that cannot be stopped for the course of the study<br>(b) Long-term ( $>7$ days) non-steroidal anti-inflammatory drugs                                                                                                                                                                                                                                                                                                                                                                                                                                                                                                 |

---

10. Known bleeding diathesis or coagulation disorder (e.g. thrombotic thrombocytopenic purpura)

---

11. Known severe liver disease (e.g. ascites or signs of coagulopathy)

---

12. Renal failure requiring dialysis

---

13. Pregnancy or breastfeeding. Women of child-bearing potential who are not using a medically accepted method of contraception that is considered reliable in the judgment of the investigator

---

14. Involvement in the planning and/or conduct of the study (applies to both AstraZeneca staff and/or staff at the study site)

---

15. Previous enrollment or randomization in the present study

---

16. Participation in another clinical study with an investigational product at any time during the 30 days prior to randomization (regardless of when treatment with the investigational product was discontinued)

---

CYP3A4: cytochrome P450 3A; DAPT: dual antiplatelet therapy; GP: glycoprotein; TIA: transient ischemic attack.

**Table S3.** THALES national lead investigators.

| <b>Region/country</b>          | <b>Lead investigators</b>         |
|--------------------------------|-----------------------------------|
| <b>Asia-Pacific</b>            |                                   |
| Australia                      | Stephen Davis                     |
| China                          | Yongjun Wang                      |
| Hong Kong                      | Lawrence Wong                     |
| India                          | Padma Srivastava<br>Sharma Vikram |
| Saudi Arabia                   | Fahmi Al-Senani                   |
| South Korea                    | Hee-Joon Bae                      |
| Taiwan                         | Tsong-Hai Lee                     |
| Thailand                       | Nijasri Charnnarong Suwanwela     |
| Vietnam                        | Huy Thang Nguyen                  |
| <b>North and South America</b> |                                   |
| Argentina                      | Sebastián Ameriso                 |
| Brazil                         | Luiz Marrone                      |
| Canada                         | Ken Butcher                       |
| Mexico                         | Antonio Arauz                     |
| Peru                           | Edwin Pretell                     |
| <b>Europe</b>                  |                                   |
| Belgium                        | Robin Lemmens                     |
| Bulgaria                       | Ekaterina Titianova               |
| Czech Republic                 | David Skoloudik                   |
| France                         | Pierre Amarenco                   |
| Germany                        | Joachim Röther                    |
| Hungary                        | Norbert Szegedi                   |
| Italy                          | Giancarlo Agnelli<br>Danilo Toni  |
| Poland                         | Anna Członkowska                  |
| Romania                        | Ovidiu-Alexandru Bajenaru         |
| Russia                         | Lyudmila Stakhovskaya             |
| Slovakia                       | Miroslav Brozman                  |
| Spain                          | Carlos Molina                     |
| Sweden                         | Lars Sjöblom                      |
|                                | Stefan James                      |
| Ukraine                        | Sergii Moskovko                   |
